# Supplementary material for: Construction of self-supporting bimetallic sulfide arrays as a highly efficient electrocatalyst for bifunctional electro-oxidation
Source: Royal Society of Chemistry journal article supplement (doi:10.1039/d1qi00640a), 2021-01-01
Supplement: d1qi00640a1.pdf [file d1qi00640a1.pdf]

## **Construction of self-supporting bimetallic sulfide arrays as a highly efficient electrocatalyst for bifunctional electro-oxidation**

Wenjun Liu<sup>a,†</sup>, Liming Dai<sup>b,†</sup>, Yiming Hu<sup>a</sup>, Ku Jiang<sup>a</sup>, Qian Li<sup>a</sup>, Yilin Deng<sup>a</sup>, Junjie Yuan<sup>a</sup>, Jian Bao<sup>a,\*</sup>, Yucheng Lei<sup>a,\*</sup>

*a. School of Material Science & Engineering, Institute for Energy Research, Jiangsu University, Zhenjiang, Jiangsu, 212013, P. R. China.*

*b. School of Chemistry and Chemical Engineering, Nanjing University of Science and Technology, Nanjing, Jiangsu, 210094, P. R. China.*

\* Corresponding Authors should be addressed to: baojian@ujs.edu.cn, yclei@ujs.edu.cn.

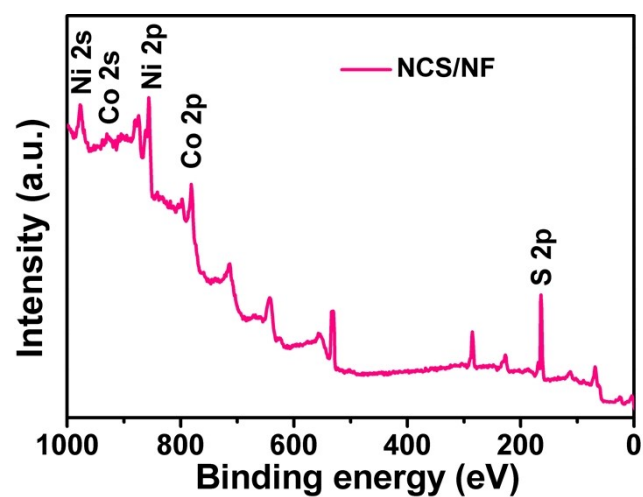

**Figure S1.** XPS spectra for the NCS/NF sample.

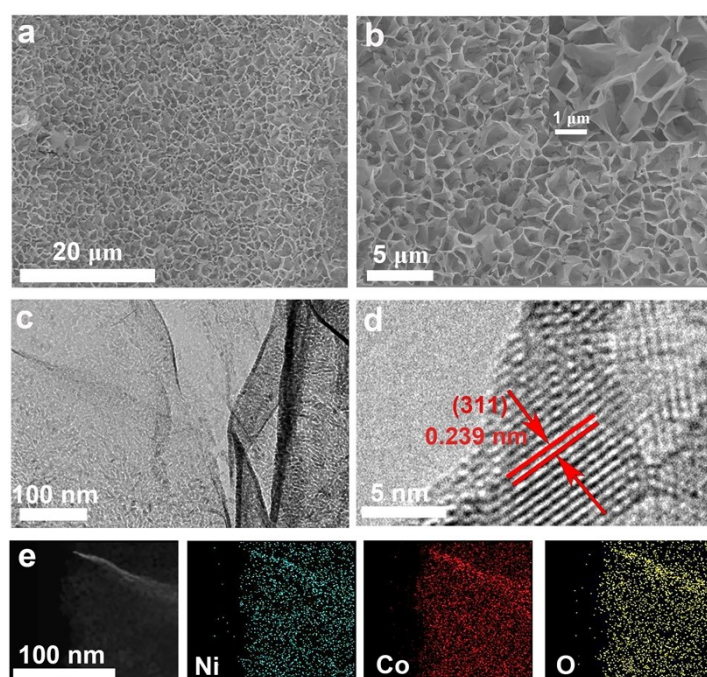

**Figure S2.** (a) Low and (b) high magnification images of NCO/NF. (c) TEM image and (d) HR-TEM image of the NCO nanosheet. (e) EDX elemental mapping images of NCO sample.

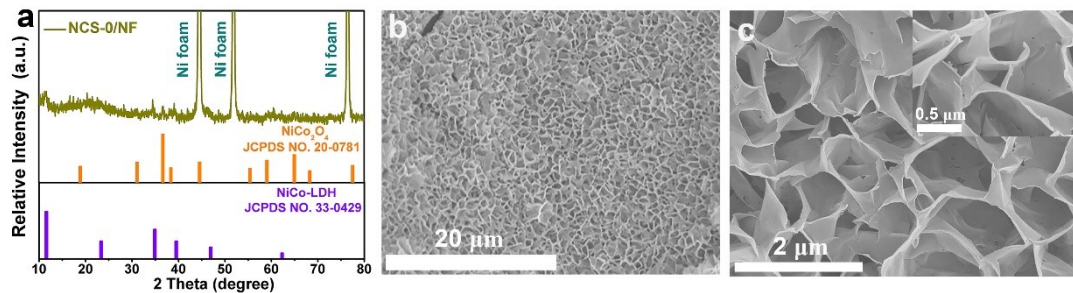

**Figure S3.** (a) XRD pattern of NCS-0/NF sample. (b) Low and (c) high magnification images of NCS-0/NF.

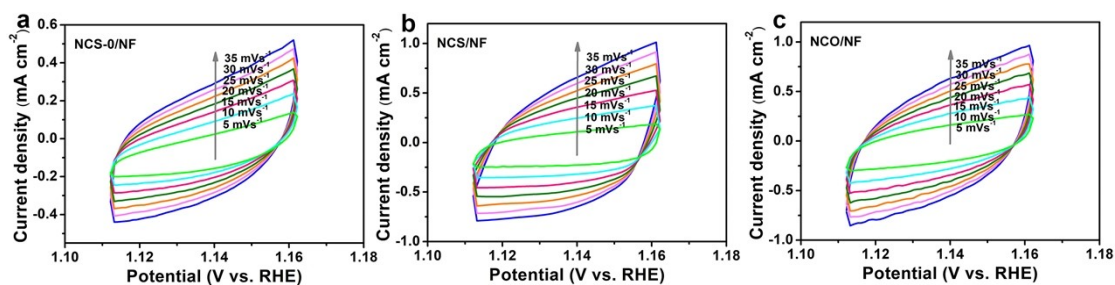

**Figure S4.** Double-layer capacitance measurements for determining electrochemically active surface area for (a) NCS-0/NF, (b) NCS/NF, and (c) NCO/NF.

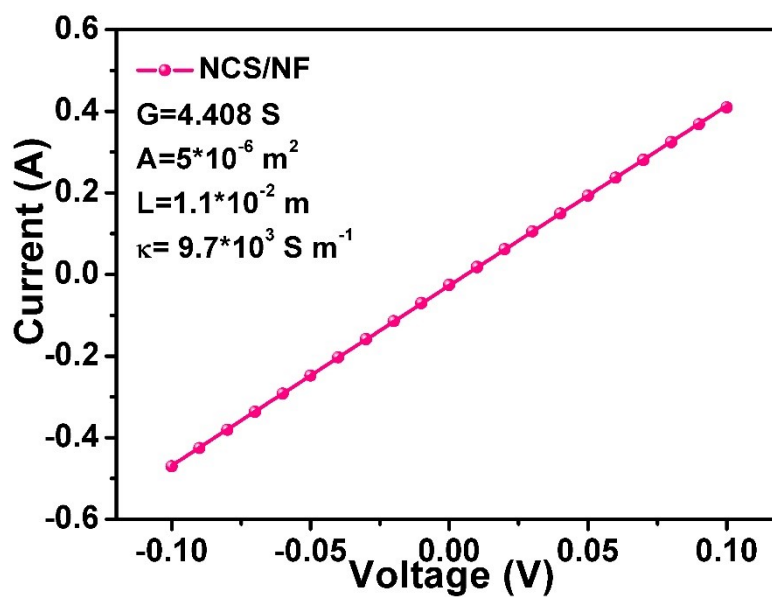

**Figure S5.** The I-U curves of NCS/NF.

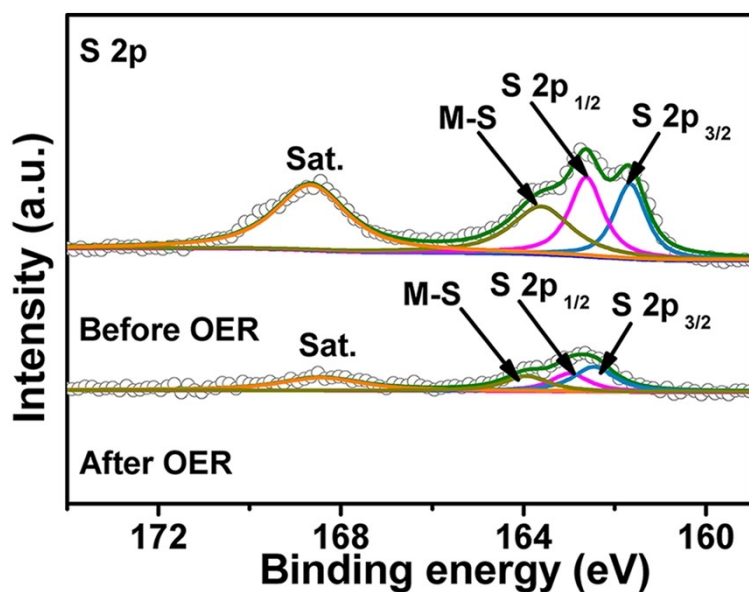

Figure S6. S 2p spectra of the NCS/NF after the OER process.

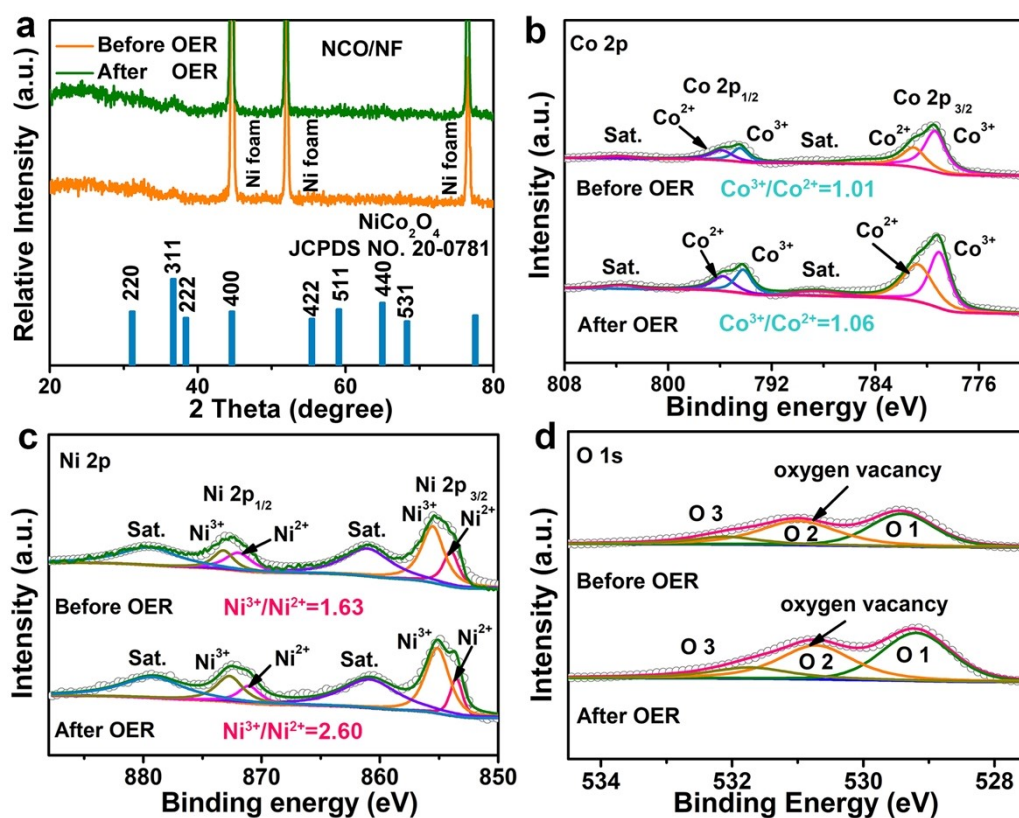

Figure S7. (a) XRD pattern of NCO/NF sample before and after the OER processes.

(b) Co 2p, (c) Ni 2p, and (d) O 1s spectra of the NCO/NF before and after the OER processes, respectively.

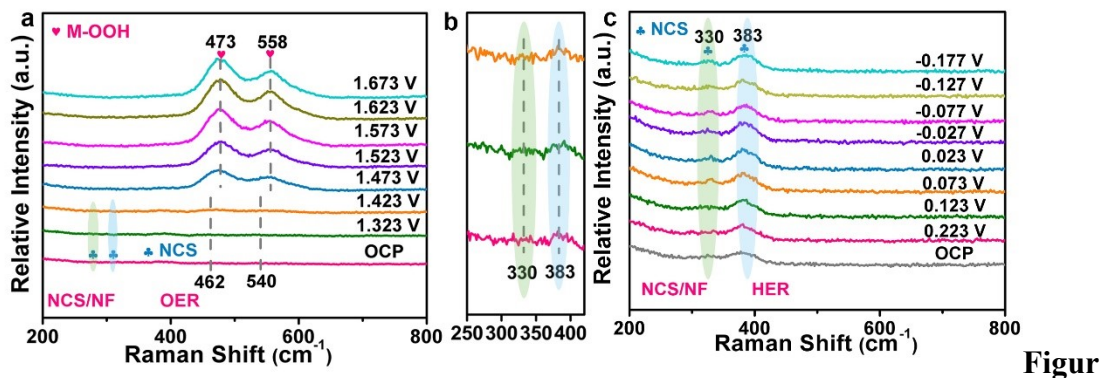

**e S8.** *In situ* Raman spectra of NCS/NF catalyst collected under multi-potential steps in 1.0 M KOH electrolyte for (a) OER, (b) OER in short range, and (c) HER.

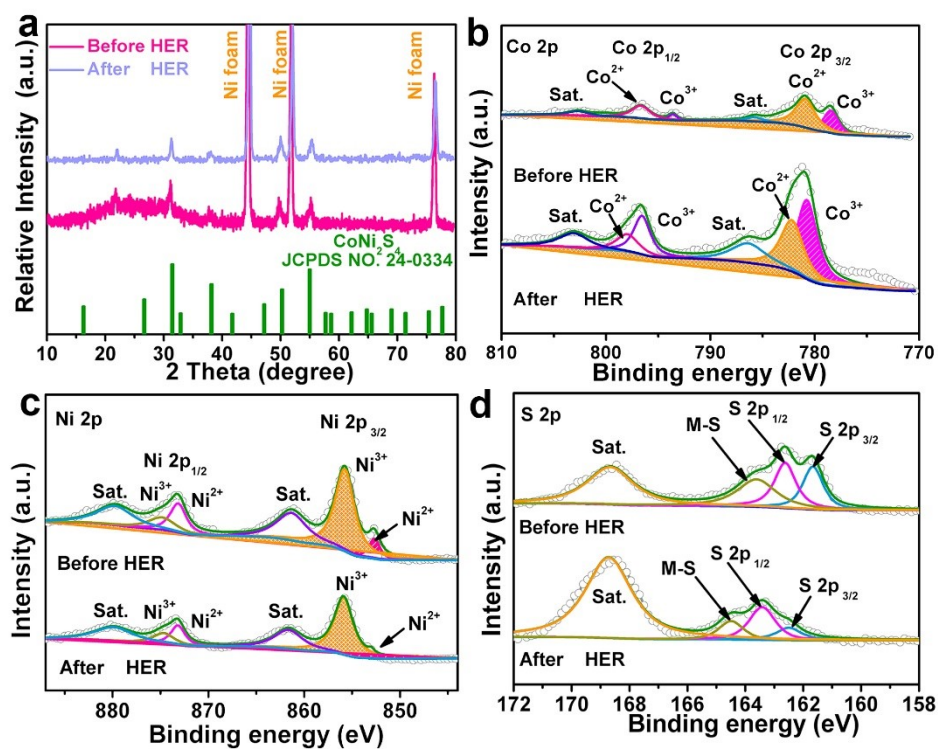

**Figure S9.** (a) XRD patterns of NCS/NF sample before and after the HER processes. (b) Co 2p, (c) Ni 2p, and (d) S 2p spectra of the NCS/NF before and after the HER processes, respectively.

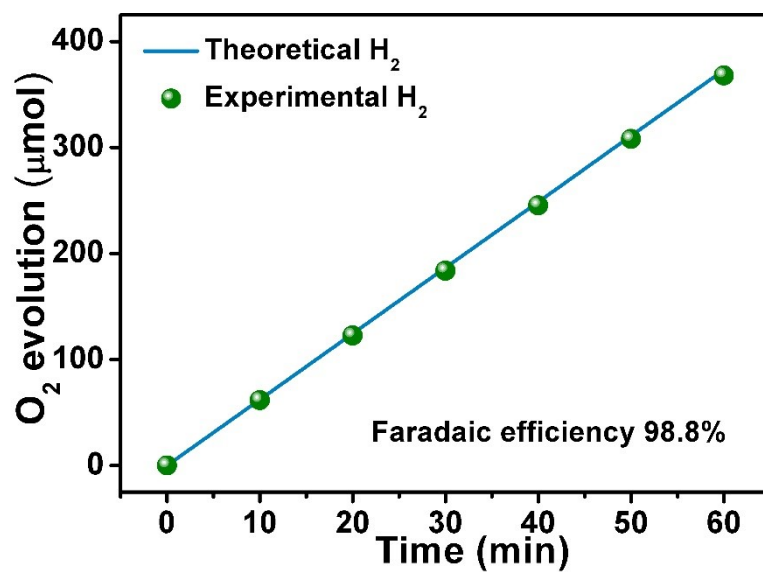

Figure S10 (a) Faradaic efficiency of NCS/NF at 20 mA·cm<sup>-2</sup>.

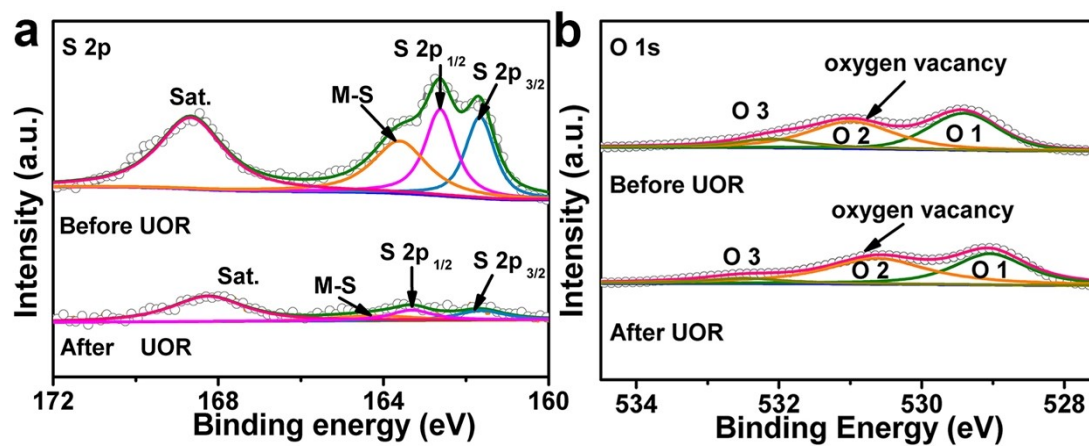

Figure S11. (a) S 2p spectra of the NCS/NF after the UOR process. (b) O 1s spectra of the NCS/NF after the UOR process.

**Table S1** Comparison of the OER activity of several recently highly active catalysts.

| Catalysts                                                            | Electrolyte | Overpotential<br>/10 mA cm <sup>-2</sup> | Reference |
|----------------------------------------------------------------------|-------------|------------------------------------------|-----------|
| NCS/NF                                                               | 1 M KOH     | 232 mV                                   | This work |
| Fe-Ni <sub>3</sub> S <sub>2</sub> /FeNi foil                         | 1 M KOH     | 282 mV                                   | [S1]      |
| Ni <sub>3</sub> S <sub>2</sub> /Ni foam                              | 1 M KOH     | 260 mV                                   | [S2]      |
| NiCo <sub>2</sub> S <sub>4</sub> /Ni foam                            | 1 M KOH     | 260 mV                                   | [S3]      |
| CNTs@Co-S/CP                                                         | 1 M KOH     | 306 mV                                   | [S4]      |
| NiCoFeP                                                              | 1 M KOH     | 273 mV                                   | [S5]      |
| NiCoFeB                                                              | 1 M KOH     | 284 mV                                   | [S6]      |
| Ni <sub>3</sub> Se <sub>4</sub> nanorod                              | 1 M KOH     | 243 mV                                   | [S7]      |
| Fe-NiO nanoparticle                                                  | 1 M KOH     | 297 mV                                   | [S8]      |
| Fe <sub>2</sub> Ni <sub>2</sub> N/Ni foam                            | 1 M KOH     | 240 mV                                   | [S9]      |
| CoV <sub>2</sub> O <sub>6</sub> @V <sub>2</sub> O <sub>5</sub> /NRGO | 1 M KOH     | 239 mV                                   | [S10]     |
| CoFe <sub>2</sub> O <sub>4</sub> @C/Ni foam                          | 1 M KOH     | 240 mV                                   | [S11]     |
| NF/NiFe-LDH                                                          | 1 M KOH     | 250 mV                                   | [S12]     |
| NF/Ni <sub>3</sub> S <sub>2</sub>                                    | 1 M KOH     | 260 mV                                   | [S13]     |

|                                                        |           |                                  |       |
|--------------------------------------------------------|-----------|----------------------------------|-------|
| Cu foil/Co <sub>3</sub> O <sub>4</sub> -C              | 1 M KOH   | 290 mV                           | [S14] |
| NiFe-NiCoO <sub>2</sub>                                | 1 M KOH   | 286 mV                           | [S15] |
| CuO@NiCo LDH/CF                                        | 1 M KOH   | 256 mV/20 mA<br>cm <sup>-2</sup> | [S16] |
| Co <sub>2</sub> NiS <sub>2.4</sub> (OH) <sub>1.2</sub> | 0.1 M KOH | 279 mV                           | [S17] |

**Table S2** Impedance fitting results of NCS/NF and the compared samples in OER.

| Sample   | R <sub>s</sub> /Ω | R <sub>ct</sub> /Ω |
|----------|-------------------|--------------------|
| NCS/NF   | 0.395             | 0.739              |
| NCO/NF   | 0.287             | 1.409              |
| NCS-0/NF | 0.411             | 2.288              |

**Table S3** Impedance fitting results of NCS/NF and the compared samples in HER.

| Sample   | R <sub>s</sub> /Ω | R <sub>ct</sub> /Ω |
|----------|-------------------|--------------------|
| NCS/NF   | 0.485             | 0.311              |
| NCO/NF   | 0.460             | 4.44               |
| NCS-0/NF | 0.349             | 45.11              |



**Table S4** Comparison of the UOR activity of several recently highly active catalysts.

| Catalysts                                               | Electrolyte           | Potential at<br>10 mA cm <sup>-2</sup> | Reference |
|---------------------------------------------------------|-----------------------|----------------------------------------|-----------|
| NCS/NF                                                  | 1 M KOH + 0.33 M urea | 1.31 V                                 | This work |
| S-MnO <sub>2</sub>                                      | 1 M KOH + 0.5 M urea  | 1.33 V                                 | [S18]     |
| NiSe <sub>2</sub>                                       | 1 M KOH + 0.33 M urea | 1.36 V                                 | [S19]     |
| NiO nanosheet<br>array                                  | 1 M KOH + 0.33 M urea | 1.38 V                                 | [S20]     |
| Ni(OH) <sub>2</sub><br>nanotube/NF                      | 1 M KOH + 0.33 M urea | 1.41 V                                 | [S21]     |
| Fe <sub>11.1%</sub> -Ni <sub>3</sub> S <sub>2</sub> /NF | 1 M KOH + 0.33 M urea | 1.44 V                                 | [S22]     |
| NiCo alloy                                              | 1 M KOH + 0.33 M urea | 1.53 V                                 | [S23]     |
| Ni(OH) <sub>2</sub><br>nanocube array                   | 1 M KOH + 0.33 M urea | 1.55 V                                 | [S24]     |
| NiMo sheet array                                        | 1 M KOH + 0.33 M urea | 1.37 V                                 | [S25]     |
| NiCo <sub>2</sub> S <sub>4</sub><br>NS/Carbon cloth     | 1 M KOH + 0.33 M urea | 1.317 V                                | [S26]     |
| NiCo <sub>2</sub> O <sub>4</sub>                        | 1 M KOH + 0.33 M urea | 1.354 V                                | [S26]     |

|                 |  |  |  |
|-----------------|--|--|--|
| NS/Carbon cloth |  |  |  |
|-----------------|--|--|--|

**Table S5** Impedance fitting results of NCS/NF and the compared samples in UOR.

| Sample | $R_s/\Omega$ | $R_{ct}/\Omega$ |
|--------|--------------|-----------------|
| NCS/NF | 0.346        | 0.302           |
| NCO/NF | 0.353        | 0.837           |

## References:

- [S1] C. Yuan, Z. Sun, Y. Jiang, Z. Yang, N. Jiang, Z. Zhao, U.Y. Qazi, W. Zhang, A. Xu, One-step in situ growth of iron-nickel sulfide nanosheets on FeNi alloy foils: high-performance and self-supported electrodes for water oxidation, *Small* 13 (2017) 1604161.
- [S2] L. Feng, G. Yu, Y. Wu, G. Li, H. Li, Y. Sun, T. Asefa, W. Chen, X. Zou, High-index faceted  $Ni_3S_2$  nanosheet arrays as highly active and ultrastable electrocatalysts for water splitting, *J. Am. Chem. Soc.* 137 (2015) 14023-14026.
- [S3] A. Sivanantham, P. Ganesan, S. Shanmugam, Hierarchical  $NiCo_2S_4$  nanowire arrays supported on Ni foam: an efficient and durable bifunctional electrocatalyst for oxygen and hydrogen evolution reactions, *Adv. Funct. Mater.* 26 (2016) 4661-4672.
- [S4] J. Wang, H. Zhong, Z. Wang, F. Meng, X. Zhang, Integrated three-dimensional carbon paper/carbon tubes/cobalt-sulfide sheets as an efficient electrode for overall water splitting, *ACS Nano* 10 (2016) 2342-2348.
- [S5] Y. Guo, J. Tang, Z. Wang, Y. Sugahara, Y. Yamauchi, Hollow porous heterometallic phosphide nanocubes for enhanced electrochemical water splitting, *Small* 14 (2018) 1802442.
- [S6] Y. Li, B. Huang, Y. Sun, M. Luo, Y. Yang, Y. Qin, L. Wang, C. Li, F. Lv, W. Zhang, S. Guo, Multimetal borides nanochains as efficient electrocatalysts for overall water splitting, *Small* 15 (2019) 1804212.
- [S7] J. Zhang, X. Tian, T. He, S. Zaman, M. Miao, Y. Yan, K. Qi, Z. Dong, H. Liu, B.Y. Xia, In situ formation of  $Ni_3Se_4$  nanorod arrays as versatile electrocatalysts for electrochemical oxidation reactions in hybrid water electrolysis, *J. Mater. Chem. A* 6 (2018) 15653-15658.
- [S8] K. Fominykh, P. Chernev, I. Zaharieva, J. Sicklinger, G. Stefanic, M. Döblinger, A. Müller, A. Pokharel, S. Böcklein, C. Scheu, T. Bein, D. Fattakhova-Rohlfing, Iron-doped nickel oxide nanocrystals as highly efficient electrocatalysts for alkaline water splitting, *ACS Nano* 9 (2015) 5180-5188.

- [S9] M. Jiang, Y. Li, Z. Lu, X. Sun, X. Duan, Binary nickel-iron nitride nanoarrays as bifunctional electrocatalysts for overall water splitting, *Inorg. Chem. Front.* 3 (2016) 630-634.
- [S10] F. Shen, Y. Wang, Y. Tang, S. Li, Y. Wang, L. Dong, Y. Li, Y. Xu, Y. Lan,  $\text{CoV}_2\text{O}_6\text{-V}_2\text{O}_5$  coupled with porous N-doped reduced graphene oxide composite as a highly efficient electrocatalyst for oxygen evolution, *ACS Energy Lett.* 2 (2017) 1327-1333.
- [S11] X. Lu, L. Gu, J. Wang, J. Wu, P. Liao, G. Li, Bimetal-organic framework derived  $\text{CoFe}_2\text{O}_4/\text{C}$  porous hybrid nanorod arrays as high-performance electrocatalysts for oxygen evolution reaction, *Adv. Mater.* 29 (2017) 1604437.
- [S12] J. Luo, J. Im, M.T. Mayer, M. Schreier, M.K. Nazeeruddin, N. Park, S.D. Tilley, H.J. Fan, M. Grätzel, Water photolysis at 12.3% efficiency via perovskite photovoltaics and Earth-abundant catalysts, *Science* 345 (2014) 1593.
- [S13] L. Feng, G. Yu, Y. Wu, G. Li, H. Li, Y. Sun, T. Asefa, W. Chen, X. Zou, High-index faceted  $\text{Ni}_3\text{S}_2$  nanosheet arrays as highly active and ultrastable electrocatalysts for water splitting, *J. Am. Chem. Soc.* 137 (2015) 14023-14026.
- [S14] T.Y. Ma, S. Dai, M. Jaroniec, S.Z. Qiao, Metal-organic framework derived hybrid  $\text{Co}_3\text{O}_4$ -carbon porous nanowire arrays as reversible oxygen evolution electrodes, *J. Am. Chem. Soc.* 136 (2014) 13925-13931.
- [S15] R. Shi, J. Wang, Z. Wang, T. Li, Y. Song, Unique  $\text{NiFe-NiCoO}_2$  hollow polyhedron as bifunctional electrocatalysts for water splitting, *J. Energy Chem.* 33 (2019) 74.
- [S16] Y. Cao, T. Wang, X. Li, L. Zhang, Y. Luo, F. Zhang, A.M. Asiri, J. Hu,\* Q. Liu \* and X. Sun, A hierarchical  $\text{CuO@NiCo}$  layered double hydroxide core-shell nanoarray as an efficient electrocatalyst for the oxygen evolution reaction, *Inorg. Chem. Commun.* 8 (2021) 3049.
- [S17] B. Wang, C. Tang, H. Wang, X. Chen, R. Cao, Q. Zhang, Core-branch  $\text{CoNi}$  hydroxysulfides with versatilely regulated electronic and surface structures for superior oxygen evolution electrocatalysis, *J. Energy Chem.* 38 (2019) 8.
- [S18] S. Chen, J. Duan, A. Vasileff, S.Z. Qiao, Size fractionation of two-dimensional sub-nanometer thin manganese dioxide crystals towards superior urea electrocatalytic conversion, *Angew. Chem. Int. Ed.* 55 (2016) 3804-3808.
- [S19] P. Xiong, X. Ao, J. Chen, J. Li, L. Lv, Z. Li, M. Zondode, X. Xue, Y. Lan, C. Wang, Nickel diselenide nanoflakes give superior urea electrocatalytic conversion, *Electrochim. Acta* 297 (2019) 833-841.
- [S20] M. Wu, G. Lin, R. Yang, Hydrothermal growth of vertically-aligned ordered mesoporous nickel oxide nanosheets on three-dimensional nickel framework for electrocatalytic oxidation of urea in alkaline medium, *J. Power Sources* 272 (2014) 711-718.
- [S21] R. Ji, D. Chan, J. Jow, M. Wu, Formation of open-ended nickel hydroxide nanotubes on three-dimensional nickel framework for enhanced urea electrolysis, *Electrochem. Commun.* 29 (2013) 21-24.

[S22] W. Zhu, Z. Yue, W. Zhang, N. Hu, Z. Luo, M. Ren, Z. Xu, Z. Wei, Y. Suo, J. Wang, Wet-chemistry topotactic synthesis of bimetallic iron-nickel sulfide nanoarrays: an advanced and versatile catalyst for energy efficient overall water and urea electrolysis, *J. Mater. Chem. A* 6 (2018) 4346-4353.

[S23] W. Xu, H. Zhang, G. Li, Z. Wu, Nickel-cobalt bimetallic anode catalysts for direct urea fuel cell, *Sci. Rep.* 4 (2014) 5863.

[S24] M. Wu, R. Ji, Y. Zheng, Nickel hydroxide electrode with a monolayer of nanocup arrays as an effective electrocatalyst for enhanced electrolysis of urea, *Electrochim. Acta* 144 (2014) 194-199.

[S25] Y. Liang, Q. Liu, A.M. Asiri, X. Sun, Enhanced electrooxidation of urea using  $\text{NiMoO}_4 \cdot x\text{H}_2\text{O}$  nanosheet arrays on Ni foam as anode, *Electrochim. Acta.* 153 (2015) 456-460.

[S26] W. Zhu, M. Ren, N. Hu, W. Zhang, Z. Luo, R. Wang, J. Wang, L. Huang, Y. Suo, J. Wang, Traditional  $\text{NiCo}_2\text{S}_4$  phase with porous nanosheet array topology on carbon cloth: a flexible, versatile and fabulous electrocatalyst for overall water and urea electrolysis, *ACS Sustain. Chem. Eng.* 6 (2018) 5011-5020.
